# Supplementary material for: Viscoelasticity in associating oligomers and polymers: experimental test of the bond lifetime renormalization model
Source: Royal Society of Chemistry journal article supplement (doi:10.1039/c9sm01930h), 2019-12-16
Supplement: c9sm01930h1.pdf [file c9sm01930h1.pdf]

## Supplementary Information

### Viscoelasticity in associating oligomers and polymers: experimental test of the bond lifetime renormalization model

Sirui Ge<sup>1</sup>†, Martin Tress<sup>2</sup>†, Kunyue Xing<sup>2</sup>, Peng-Fei Cao<sup>3</sup>, Tomonori Saito<sup>3</sup>, and Alexei P. Sokolov<sup>2, 3\*</sup>

[†] The two authors contributed equally to this work.

[\*] Corresponding author: Alexei P. Sokolov (sokolov@utk.edu)

<sup>1</sup> University of Tennessee, Knoxville, Department of Materials Science, Knoxville, Tennessee 37996, United States

<sup>2</sup> University of Tennessee, Knoxville, Department of Chemistry, Knoxville, Tennessee 37996, United States

<sup>3</sup> Oak Ridge National Laboratory, Chemical Sciences Division, Oak Ridge, Tennessee 37831, United States

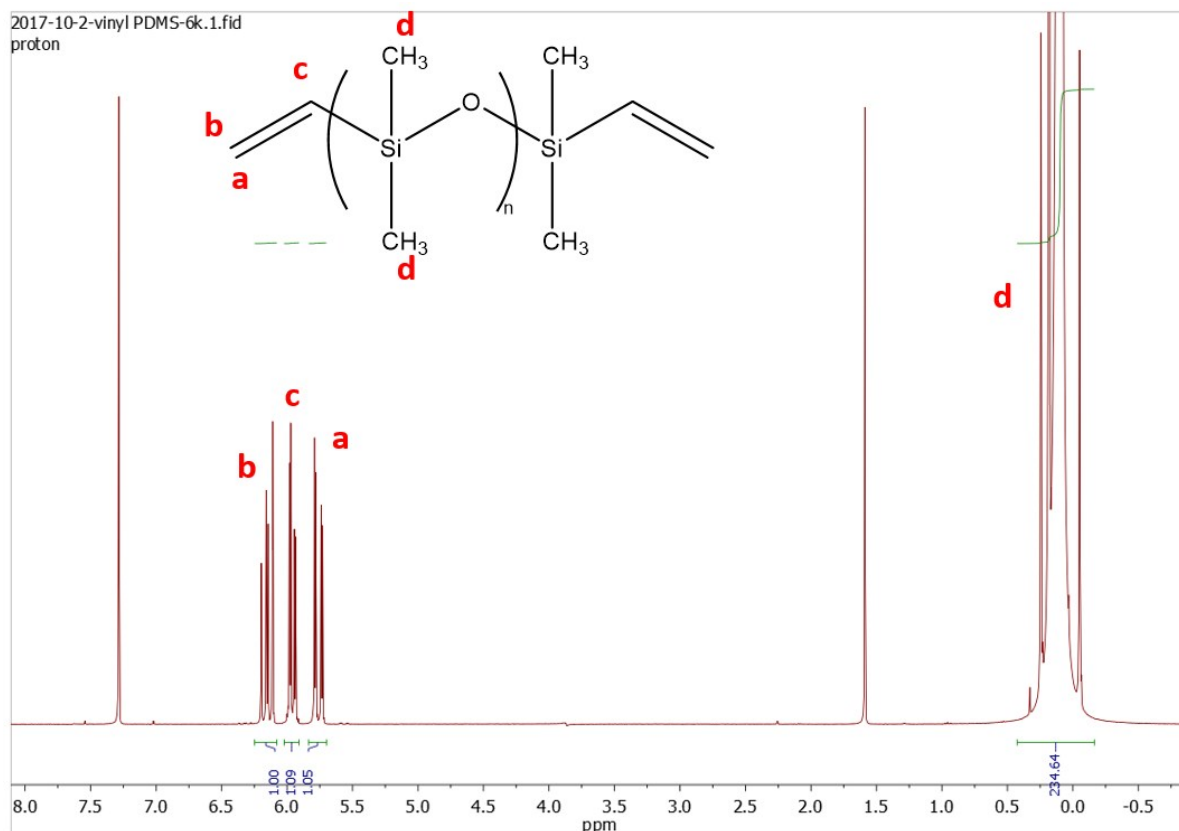

**Figure S1:** <sup>1</sup>H NMR spectra of vinyl-terminated PDMS with *DP* = 83.

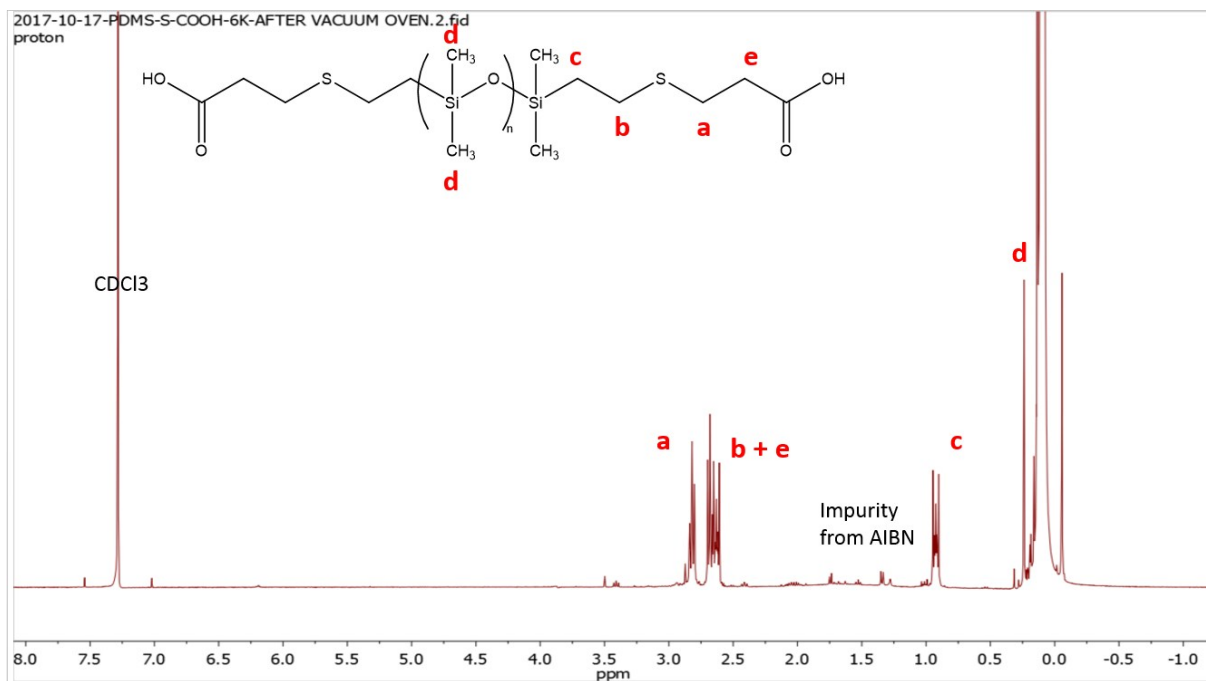

**Figure S2:** <sup>1</sup>H NMR spectra of PDMS-S-COOH-83.

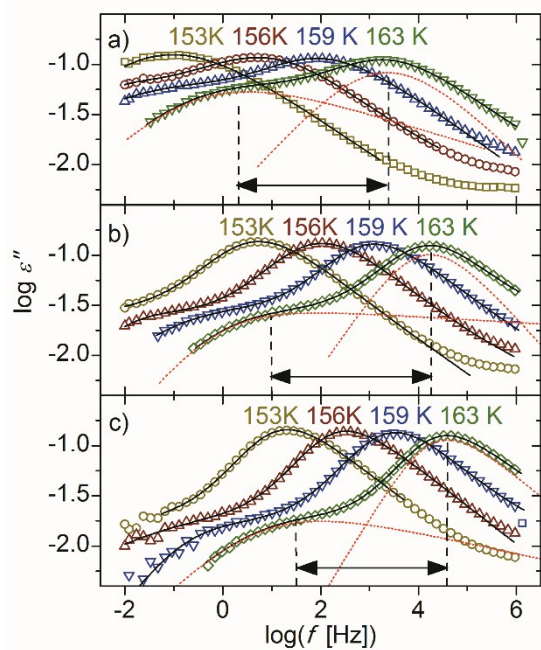

**Figure S3:** Dielectric loss spectra of PDMS-NH<sub>2</sub> with a *DP* of (a) 22, (b) 50, and (c) 74. Taken from [1].

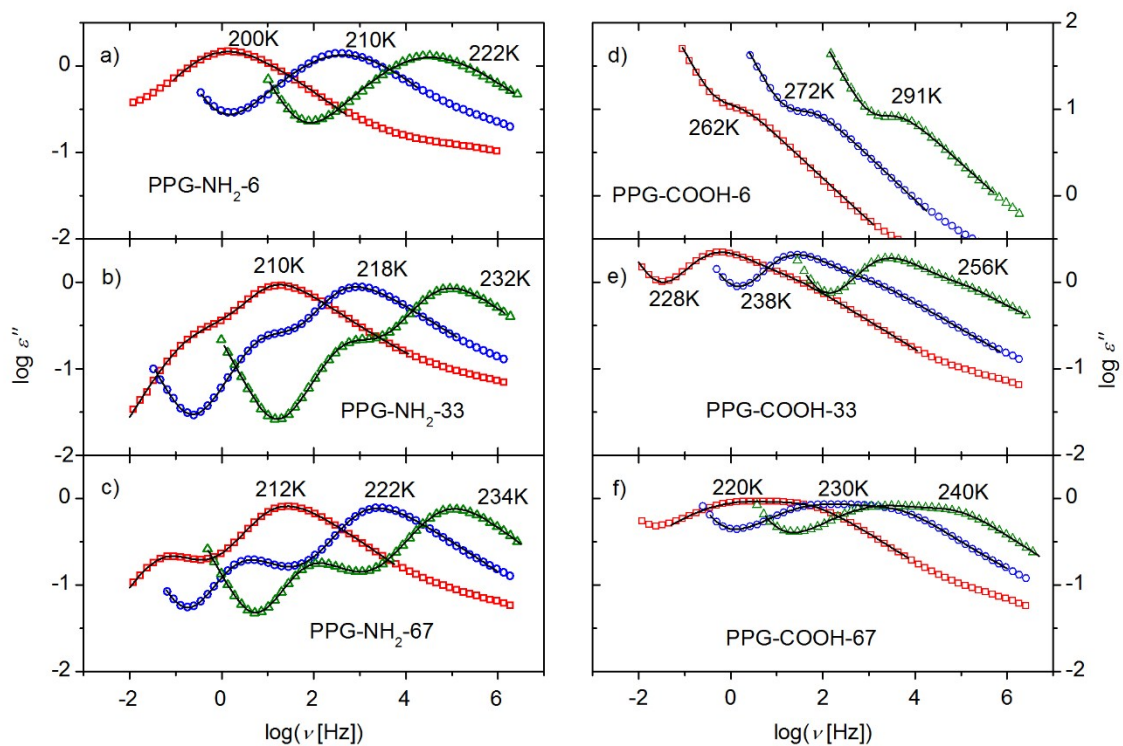

**Figure S4:** Dielectric loss spectra of PPG-NH<sub>2</sub> with a *DP* of (a) 6, 8b) 33, and (c) 67 as well as of PPG-COOH with a *DP* of (d) 6, (e) 33, and (f) 67. Taken from [2].

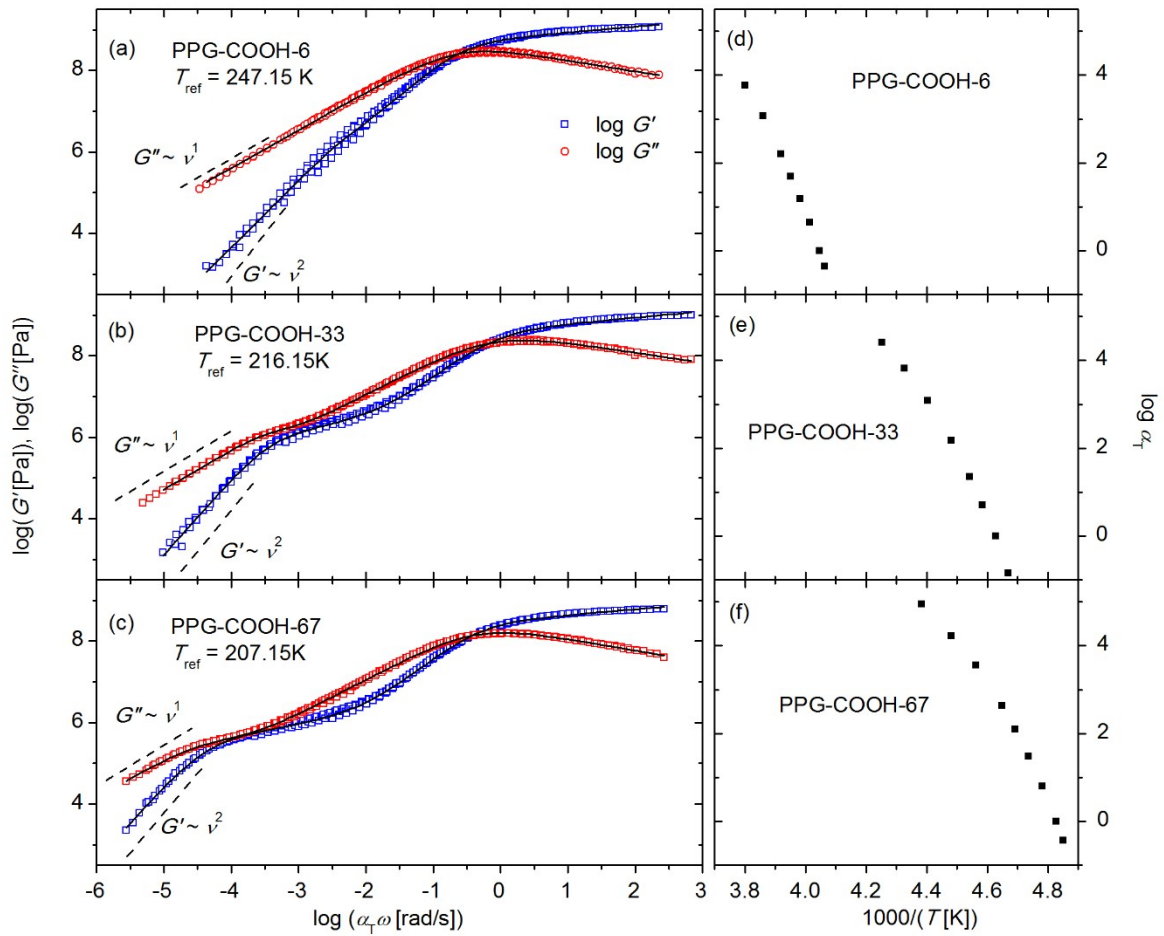

**Figure S5:** Shear modulus master curves constructed from linear viscoelastic spectra using tTS for PPG-COOH with (a)  $DP = 6$ , (b)  $DP = 33$  and (c)  $DP = 67$ , and the respective shift parameters (d-f). Modified after [2].

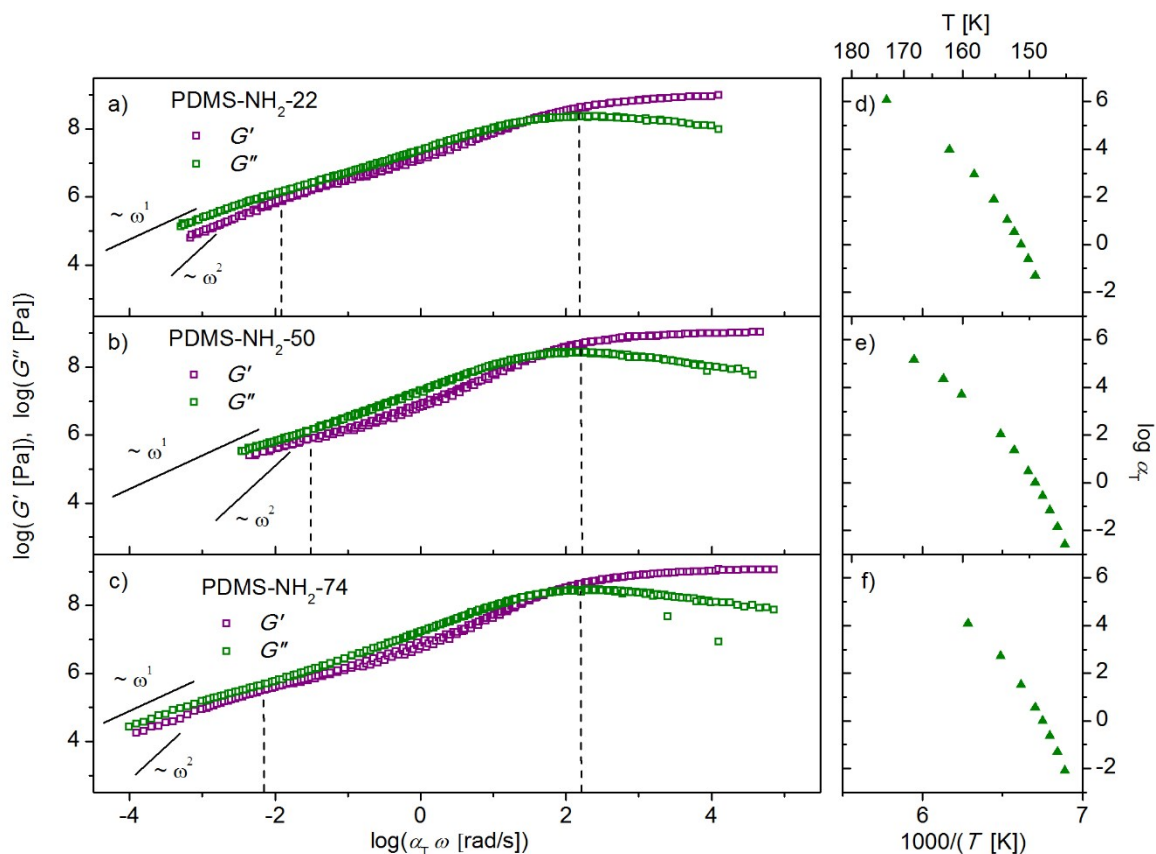

**Figure S6:** Master curves constructed from linear viscoelastic spectra using TTS for PDMS-NH<sub>2</sub> with (a)  $DP = 22$  ( $T_{\text{ref}} = 151$  K), (b)  $DP = 50$  ( $T_{\text{ref}} = 149$  K), (c)  $DP = 74$  ( $T_{\text{ref}} = 148$ ). The master curves were shifted horizontally to match their  $\alpha$ -relaxation peak positions and cut at low frequencies due to the onset of crystallization. The temperature dependence of the horizontal shift factors  $\alpha_T$  employed for the TTS is given for (d)  $DP = 22$ , (e)  $DP = 50$  and (f)  $DP = 74$ . Modified after [1].

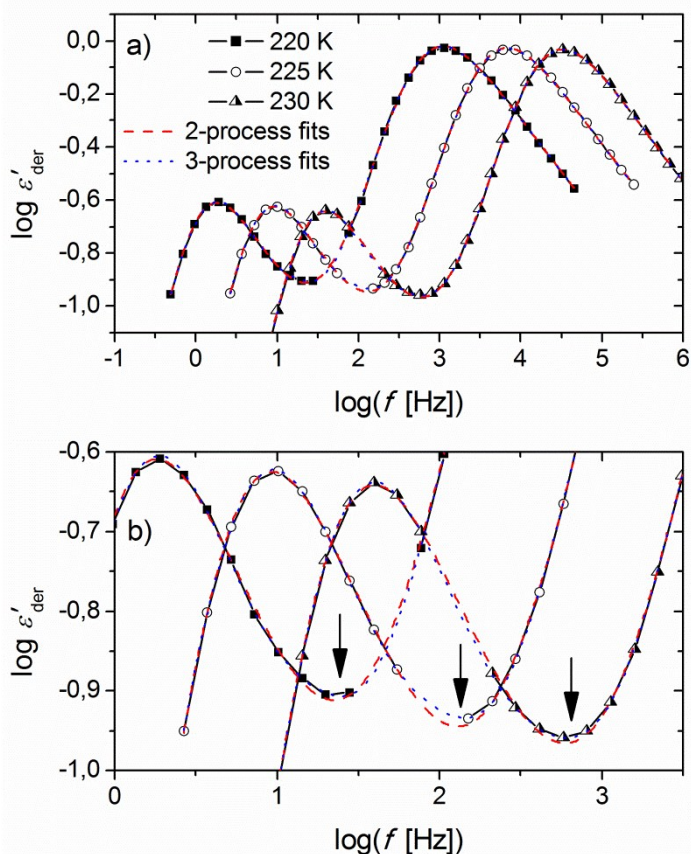

**Figure S7:** (a) Dielectric permittivity derivative spectra of PPG-NH<sub>2</sub>-67 for different temperatures as indicated as well as respective fit functions composed of two (dashed red lines) and three (dotted blue lines) Havriliak-Negami functions. (b) Close-up of the minimum region in-between the two relaxation peaks of the same data sets (identical symbol assignment as in (a)); the arrows indicate the location of the biggest deviation between the data and the best-fit using two Havriliak-Negami functions which suggests the presence of a third process.

## References

1. Xing, K.; Tress, M.; Cao, P.; Cheng, S.; Saito, T.; Novikov, V. N.; Sokolov, A. P. Hydrogen-bond strength changes network dynamics in associating telechelic PDMS. *Soft Matter* **2018**, *14*, 1235-1246.
2. Xing, K.; Tress, M.; Cao, P.-F.; Fan, F.; Cheng, S.; Saito, T.; Sokolov, A. P. The Role of Chain-End Association Lifetime in Segmental and Chain Dynamics of Telechelic Polymers. *Macromolecules* **2018**, *51* (21), 8561-8573.
